# Supplementary material for: Labeling Microplastics with Fluorescent Dyes for Detection, Recovery, and Degradation Experiments
Source: MDPI journal article supplement (doi:10.3390/molecules27217415), 2022-11-01
Supplement: s1 [file s1]

Supplemental information

## **Labeling Microplastics with Fluorescent Dyes for Detection, Recovery, and Degradation Experiments**

**Zhiqiang Gao <sup>1</sup>, Kendall Wontor <sup>1</sup> and James V. Cizdziel <sup>1\*</sup>**

<sup>1</sup> Department of Chemistry and Biochemistry, University of Mississippi, University, MS 38677, USA; [zgao2@go.olemiss.edu](mailto:zgao2@go.olemiss.edu) (Z.G.); [kwontor@go.olemiss.edu](mailto:kwontor@go.olemiss.edu) (K.W.)

\* Correspondence:

Email address: [cizdziel@olemiss.edu](mailto:cizdziel@olemiss.edu) (J.V.C)

The Number of Pages: 9

The Number of Tables: 2

The Number of Figures: 8

**Table S1. Summary of polymers' characteristics and sources.**

| Polymer                                 | Abbreviation | Shape/Color        | Size range<br>(mm)* | Melting<br>point (°C) | Glass transition<br>(°C) |
|-----------------------------------------|--------------|--------------------|---------------------|-----------------------|--------------------------|
| Ultra low-density ethylene              | ULDPE        | Pellet/Clear       | 5.1 ± 0.1           | 123.4                 | -110                     |
| Low-density polyethylene                | LDPE.1       | Pellet/Clear       | 4.5 ± 0.3           | 113.5                 | -110                     |
| Low-density polyethylene                | LDPE.2       | Pellet/Clear       | 4.7 ± 0.3           | 105.2                 | -110                     |
| Linear low-density polyethylene         | LLDPE.1      | Pellet/Clear       | 5.0 ± 0.1           | 122.4                 | -110                     |
| Linear low-density polyethylene         | LLDPE.2      | Pellet/White       | 5.1 ± 0.1           | 120.8                 | -110                     |
| Medium-density polyethylene             | MDPE         | Pellet/White       | 4.8 ± 0.2           | 124.4                 | -110                     |
| High-density polyethylene               | HDPE.1       | Pellet/White       | 4.8 ± 0.1           | 130.6                 | -110                     |
| High-density polyethylene               | HDPE.2       | Pellet/White       | 4.6 ± 0.2           | 134.8                 | -110                     |
| Polypropylene                           | PP           | Pellet/Clear       | 4.2 ± 0.3           | 164.7                 | -10                      |
| Polyester                               | PEST         | Fiber/White        | 10.0 ± 2.0          | 251.3                 | 68.3                     |
| Polyethylene terephthalate              | PET.1        | Pellet/White       | 3.3 ± 0.4           | 243.5                 | 80.2                     |
| Recycled polyethylene terephthalate     | PET.2        | Pellet/Yellowish   | 4.9 ± 0.2           | 254.7                 | 73-78                    |
| Ethylene-vinyl acetate                  | EVA          | Fragment/Clear     | 4.9 ± 0.4           | 87.2                  | -20                      |
| Acrylonitrile-butadiene-styrene         | ABS          | Pellet/Black       | 3.2 ± 0.1           | ~200                  | 108.6                    |
| Expanded polystyrene foam               | EPS          | Foam/White         | 2.6 ± 0.8           | 270                   | 106.5                    |
| Polystyrene                             | PS           | Pellet/Clear       | 3.5 ± 0.2           | 270                   | 103.4                    |
| Nylon 6                                 | PA6          | Pellet/White       | 3.3 ± 0.1           | 220.7                 | 60                       |
| Nylon 6,6                               | PA66         | Pellet/White       | 2.8 ± 0.2           | 259.9                 | 55-58                    |
| Polyvinyl chloride                      | PVC.1        | Pellet/Clear       | 4.2 ± 0.2           | 100-260               | 65-85                    |
| Polyvinyl chloride with phthalates      | PVC.2        | Pellet/Clear       | 4.1 ± 0.3           | 100-260               | 65-85                    |
| Cellulose acetate                       | CA           | Fragment/White     | 0.39 ± 0.29         | 230-300               | 100-130                  |
| Weathered polycarbonate                 | PC           | Fragment/Clear     | 0.5-1               | 230-260               | 140-150                  |
| Weathered low-density<br>polyethylene   | LDPE-w       | Fragment/Blue      | 1-3                 | 85-125                | -110                     |
| Weathered polyethylene<br>terephthalate | PETE-w       | Film/Clear         | 1-3                 | 245-265               | 73-78                    |
| Weathered nylon 6                       | PA6-w        | Fragment/Yellowish | 0.5-1               | 210-220               | 60                       |

\*Major dimensions were measured for irregular MPs and diameters were reported for spherical MPs. Melting point and glass transition temperatures were either provided by Hawaii Pacific University, PerkinElmer, and Omnexus. LLDPE.1: ethylene-octene copolymer; LLDPE.2: LLDPE made with metallocene catalyst; HDPE.1: ethylene-hexene copolymer; HDPE.2: regular high-density polyethylene.

**Table S2. Information of applied dyes.**

| Dye (product number) | State  | Density (g/mL) | Supplier      |
|----------------------|--------|----------------|---------------|
| iDye blue (JID 451)  | Solid  | /              | Jacquard      |
| iDye pink (JID 456)  | Solid  | /              | Jacquard      |
| Rit pink (2095)      | Liquid | 1.086          | Rit           |
| Rit blue (2283)      | Liquid | 1.072          | Rit           |
| Nile red (N3013)     | Solid  | /              | Sigma-Aldrich |

**Table S3. Step-by-step procedure for staining of microplastics with fluorescent dyes.**

| Step | Action                                                                                                                                                                                                                                                            |
|------|-------------------------------------------------------------------------------------------------------------------------------------------------------------------------------------------------------------------------------------------------------------------|
| 1    | Weigh out the MPs for staining and record its mass.                                                                                                                                                                                                               |
| 2    | Based on the type of dye, dilute or dissolve the dye to the following concentrations using deionized (DI) water (Rit dye: 55 mg/mL; iDye dye: 5 mg/mL; Nile red: 2 µg/mL).                                                                                        |
| 3    | Mix MPs with the prepared dye in a ratio of 5 mg of MP:1 mL of dye in a clean glass vial.                                                                                                                                                                         |
| 4    | Heat the mixture at 70°C for 3 hours. Use an oven mat or rack to avoid direct contact between the vial and the oven bottom. Directly placing the vials onto the oven floor may result in damage to any MPs on the bottom of the vial due to the high temperature. |
| 5    | After staining, thoroughly rinse the MPs with methanol and DI water to remove any dye residues attached to the surface.                                                                                                                                           |
| 6    | Dry the rinsed MPs in a laminar fume hood. Store at room temperature until use.                                                                                                                                                                                   |

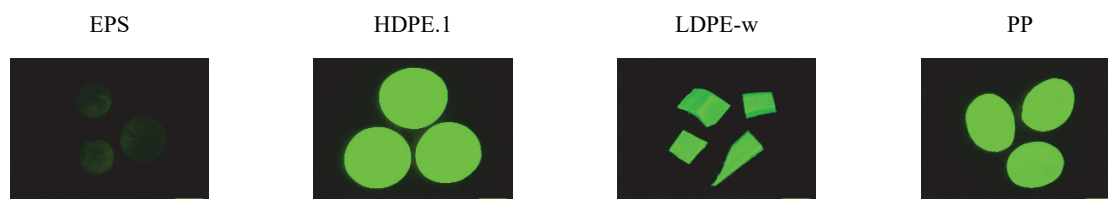

Figure S1. Green fluorescence microscopic images of polymers stained by 2 µg/mL Nile red at 70°C for 3 hours. Scale bar denotes 1 mm.

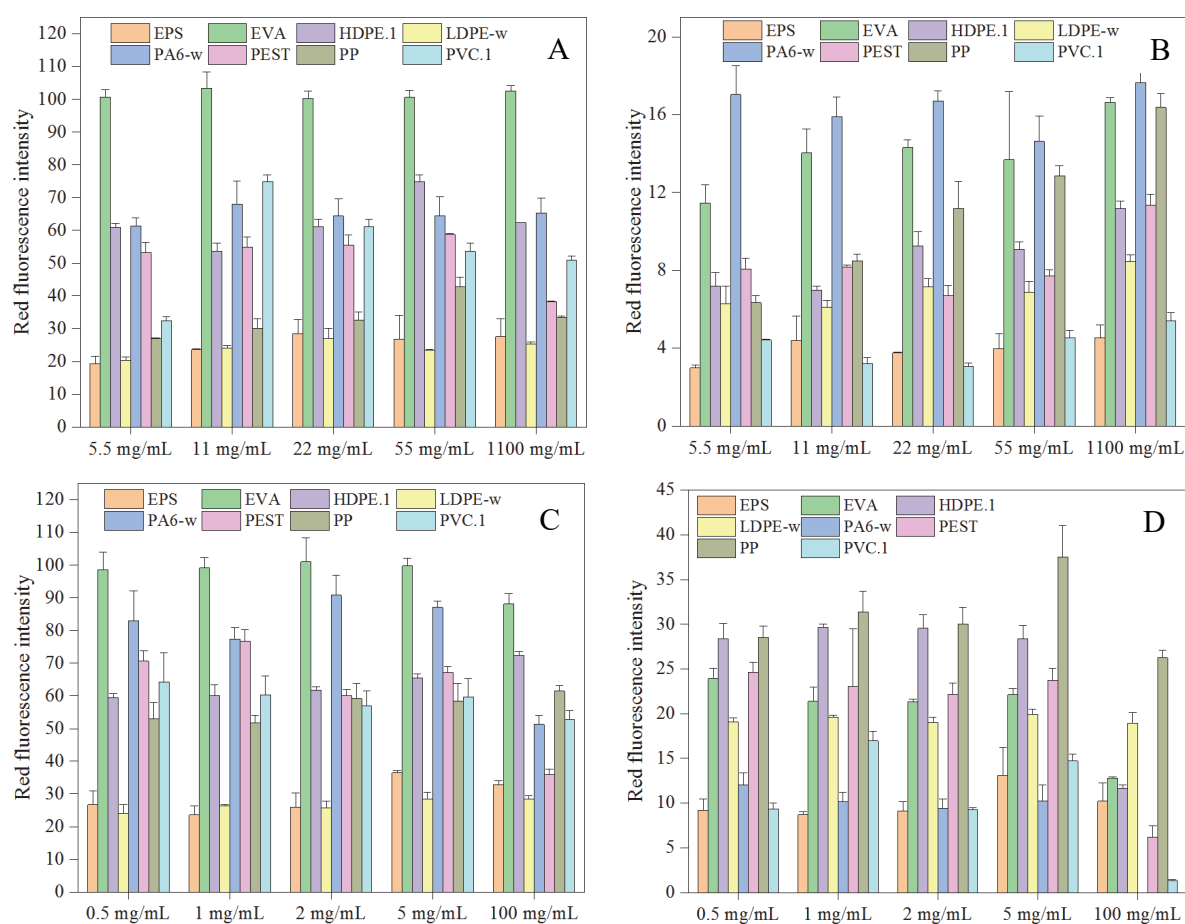

Figure S2. The influence of dye concentrations on microplastic staining at 70 °C for 3 h. A: Rit pink dye; B: Rit blue dye; C: iDye pink dye; D: iDye blue dye.

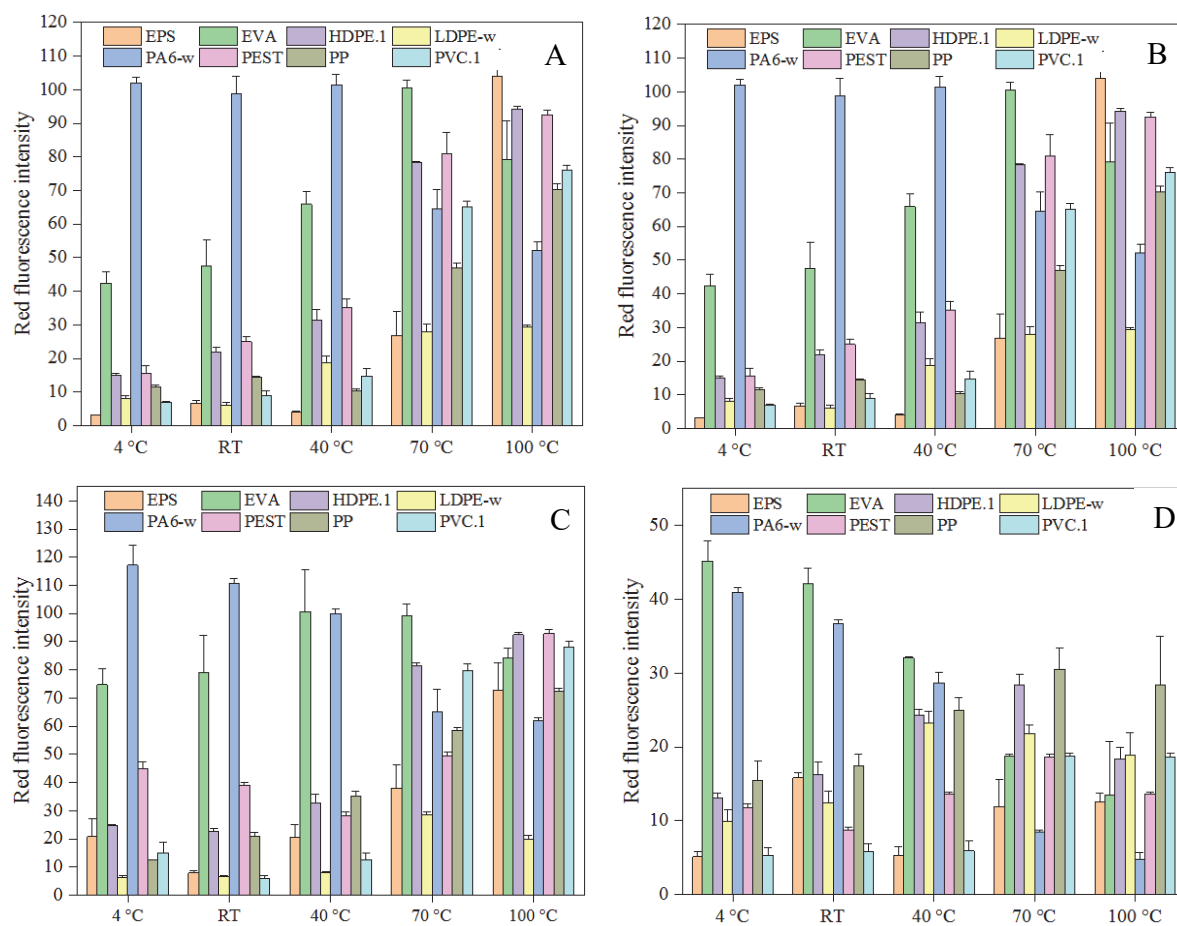

Figure S3. The influence of temperatures on microplastic staining with Rit dyes and iDye dyes concentrations of 55 mg/mL and 5 mg/mL for 3 h. A: Rit pink dye; B: Rit blue dye; C: iDye pink dye; D: iDye blue dye.

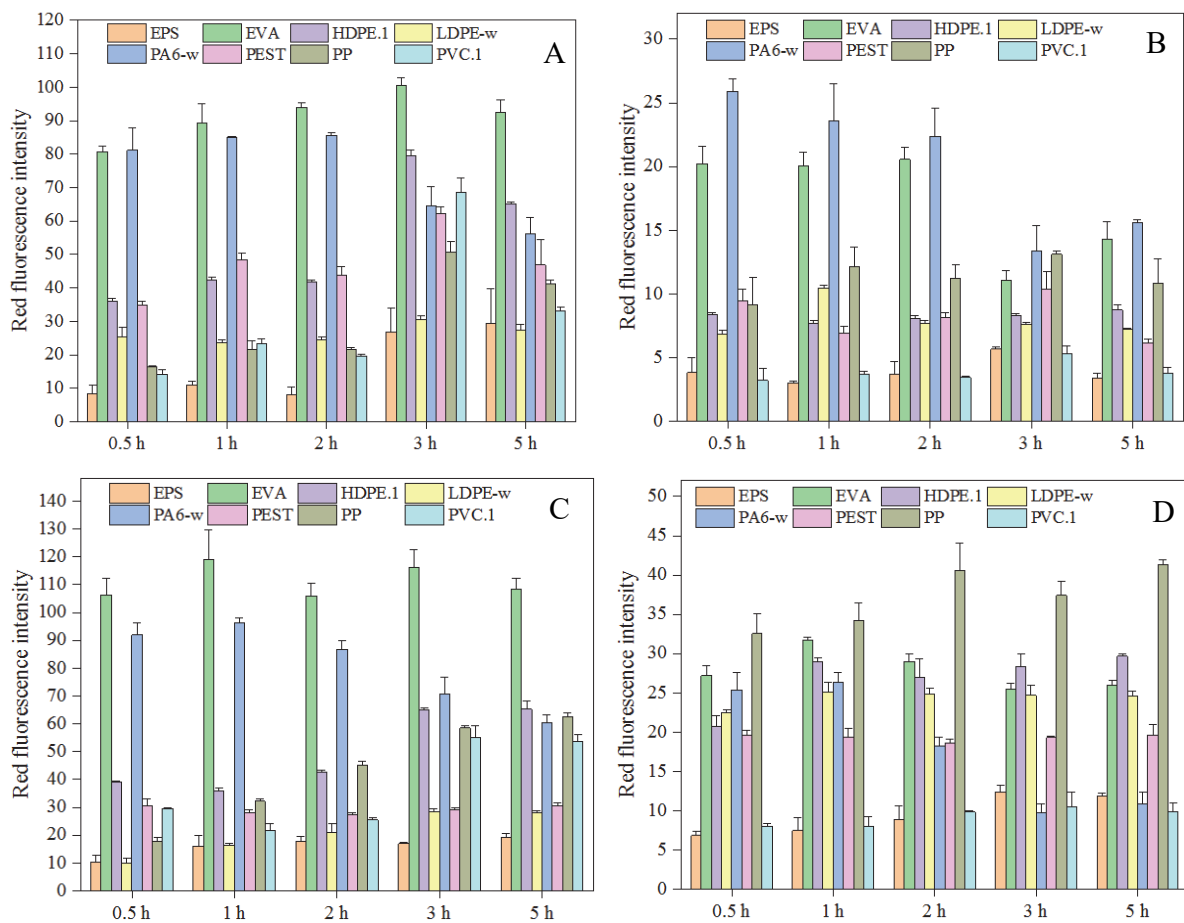

Figure S4. The influence of time on microplastic staining with Rit dyes and iDye dyes concentrations of 55 mg/mL and 5 mg/mL at 70 °C. A: Rit pink dye; B: Rit blue dye; C: iDye pink dye; D: iDye blue dye.

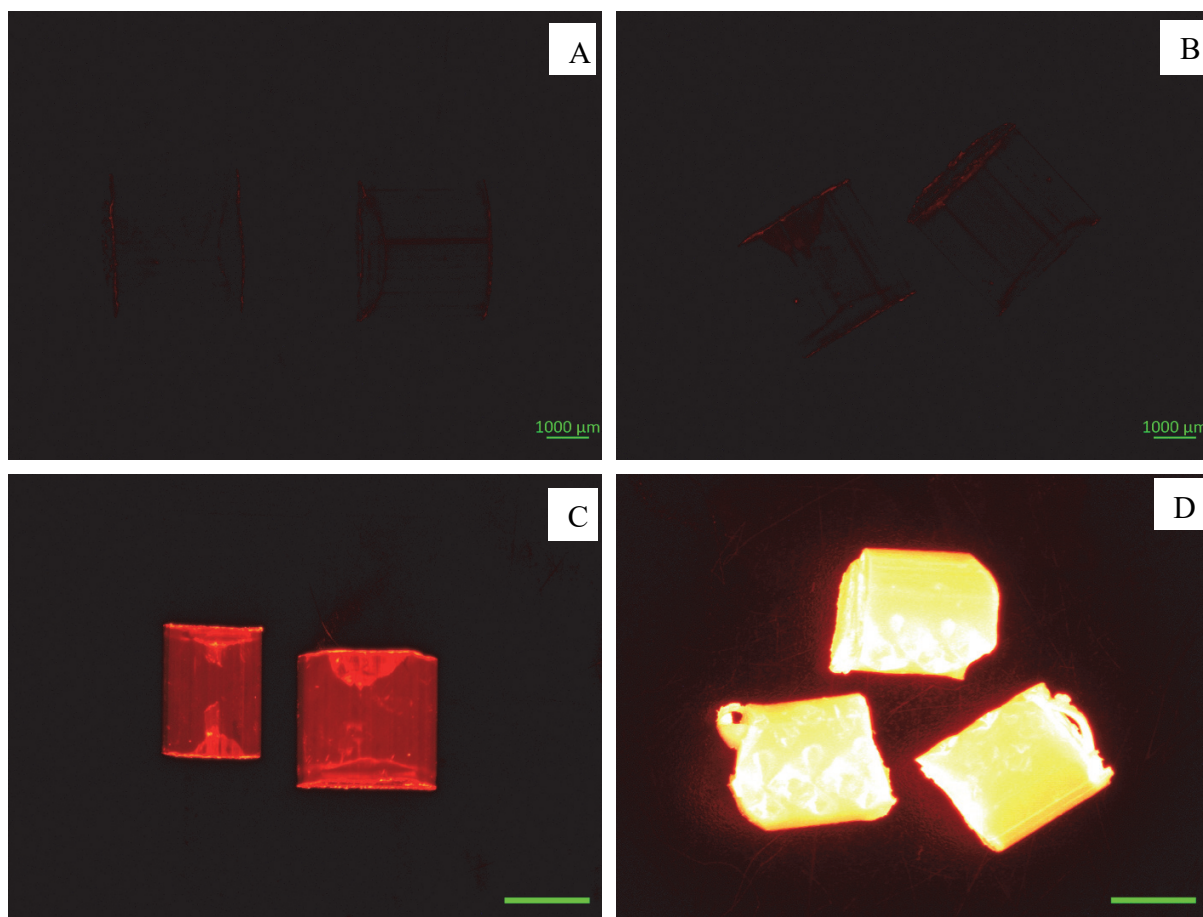

Figure S5. Red fluorescence microscope images of black ABS pellets stained by (A) 55 mg/mL Rit pink dye, (B) 5 mg/mL iDye pink dye, and (C) 2 mg/mL Nile red, and clear ABS pellets stained by (D) 2 mg/mL Nile red at 70 °C for 3 hours. Scale bars denote 1000  $\mu\text{m}$ .

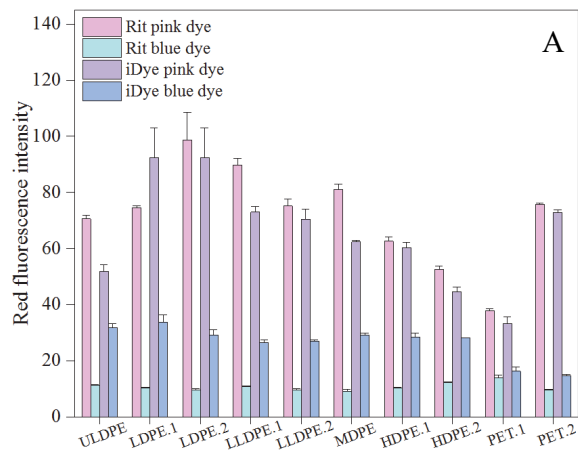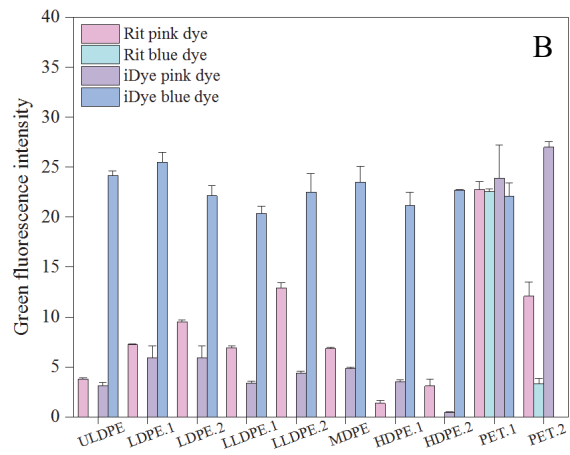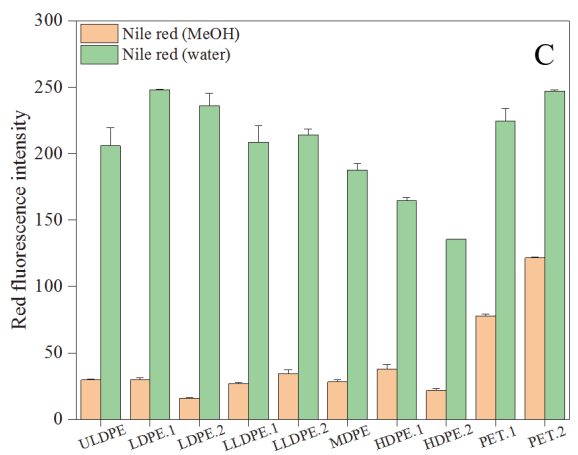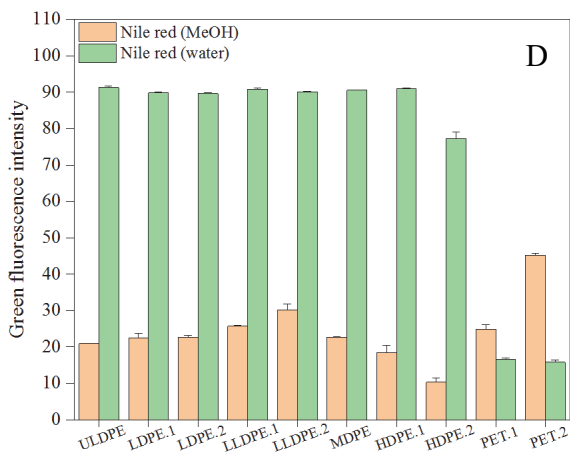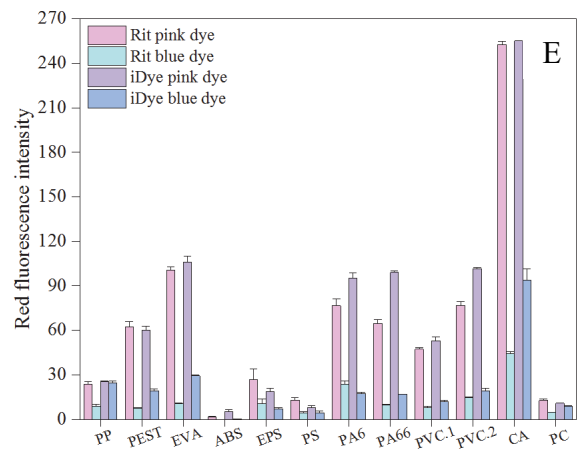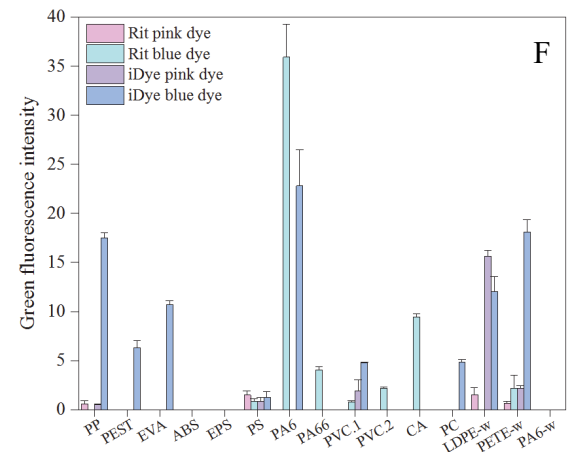



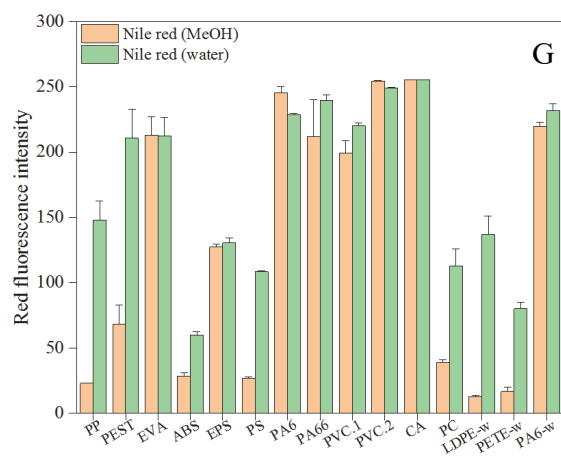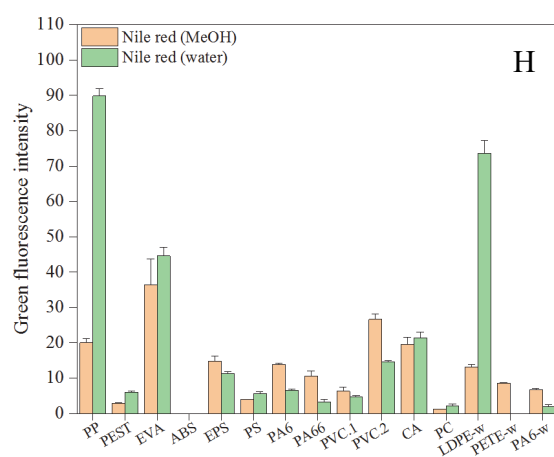

Figure S6. Different polymers stained by textile dyes (A, B, E and F) and Nile red (C, D, G and H) with variable red fluorescence intensities.

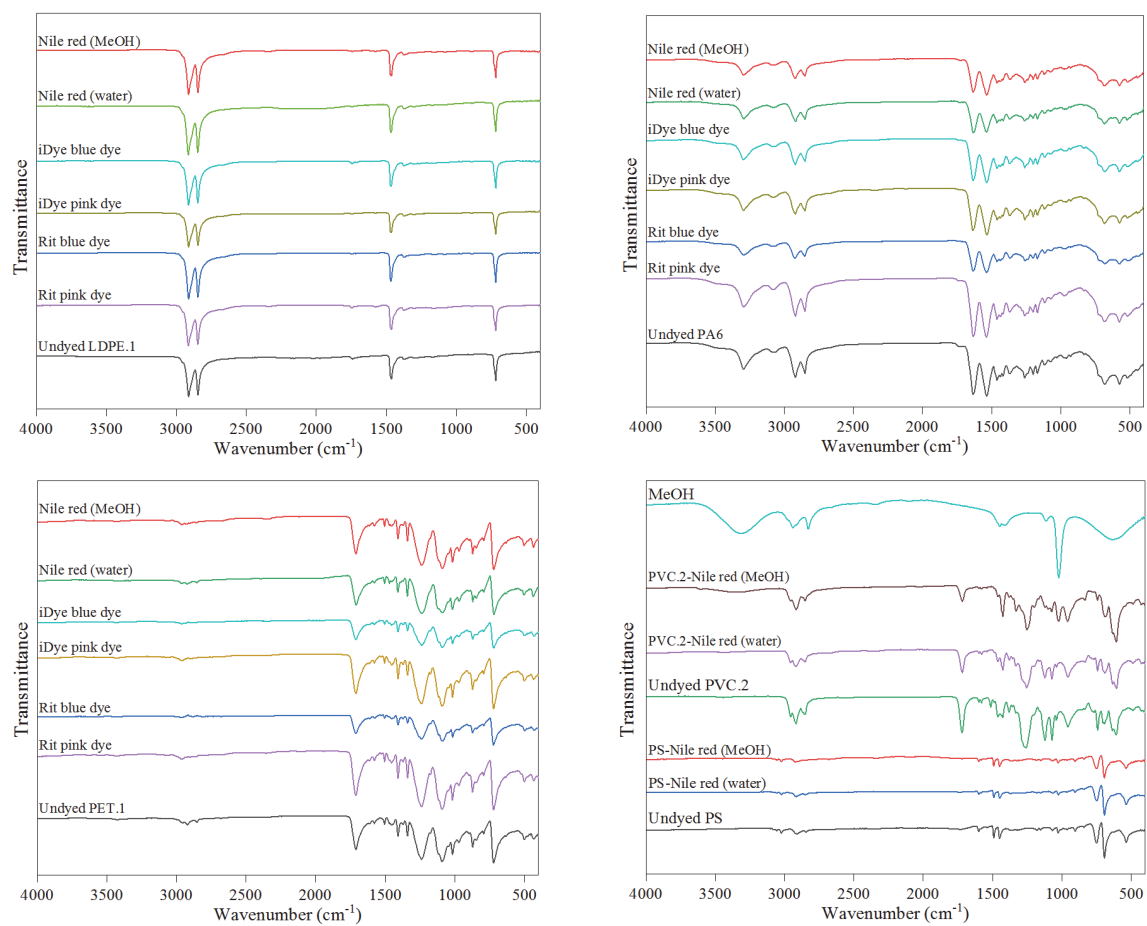

Figure S7. FTIR spectrum of LDPE.1, PA6, PET.1, PVC.2, and PS stained by different dyes.

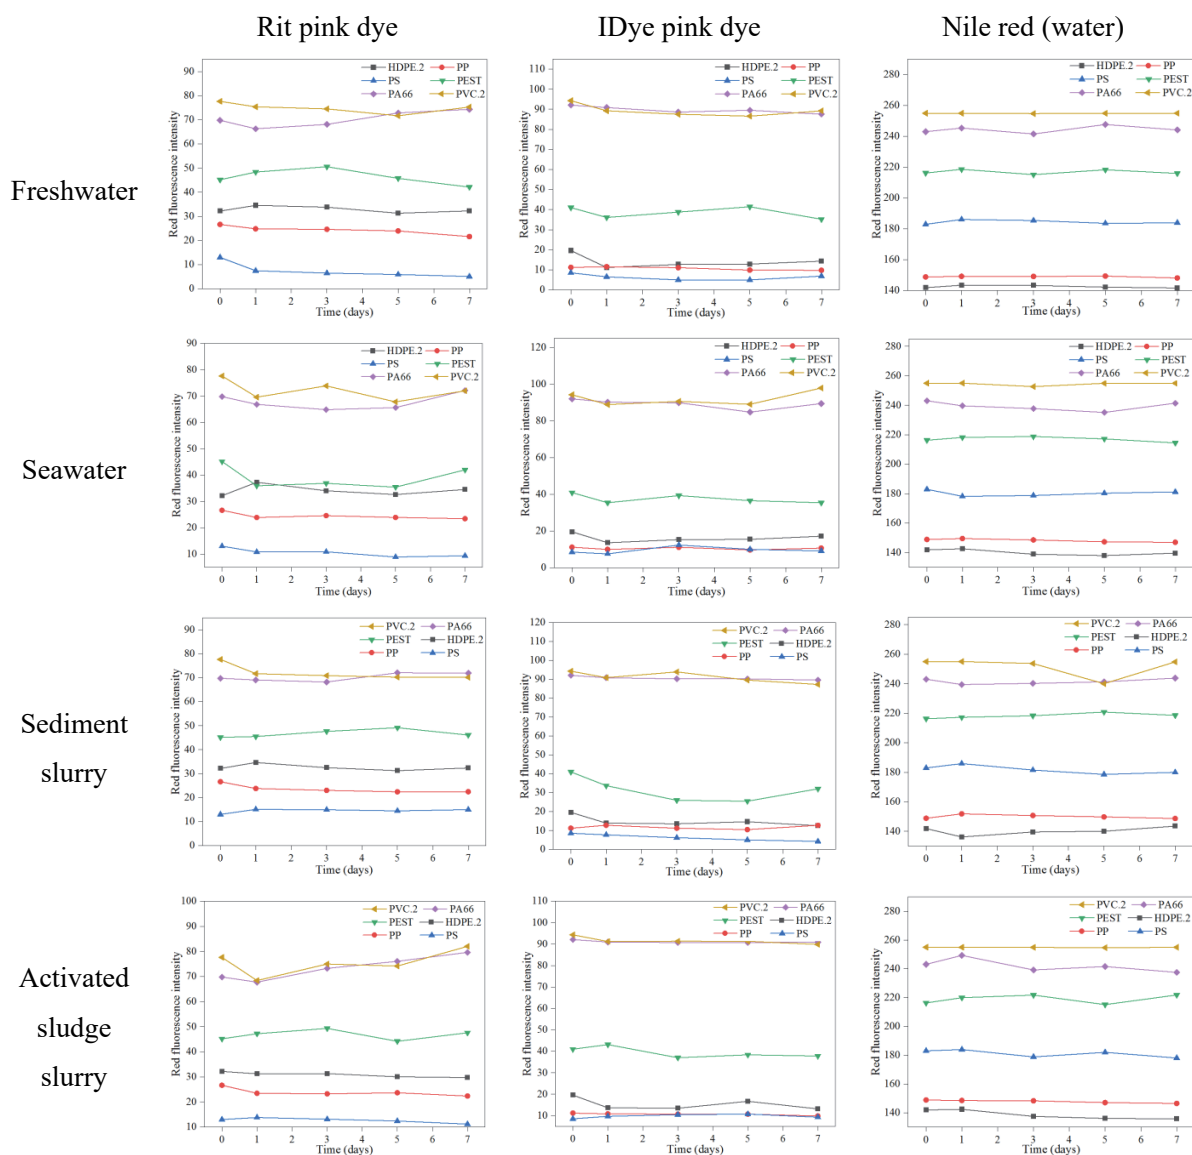

Figure S8. Fluorescence intensity stability of Rit pink dye, iDye pink dye and water-based Nile red for 7 days in lake water, seawater, sediment slurry and activated sludge slurry.
